# Supplementary material for: A method for reporting and classifying acute infectious diseases in a prospective study of young children: TEDDY
Source: Springer Nature journal article supplement (doi:10.1186/s12887-015-0333-8), 2015-03-19
Supplement: MOESM4 [file 9746858]

**7a Acute Illnesses (question on pages 14-16) -Has the child been ill since the last visit? Record all chronic illnesses/conditions on the next page.**

Local Use Only

SubjectID

No (Continue to the next section)

Yes (fill in the table)

| Date illness first appeared<br>(DD/MMM/YYYY)                                                      | ICD-10 Code: ONLY<br>code <u>Symptoms</u> here -<br>(ALWAYS CODE<br>SYMPTOMS)                                                                                                  | Fever? (temperature is<br>equal to or higher than<br>38°C or 101°F)                                        | Diagnosis                                                                                                                                                                             |
|---------------------------------------------------------------------------------------------------|--------------------------------------------------------------------------------------------------------------------------------------------------------------------------------|------------------------------------------------------------------------------------------------------------|---------------------------------------------------------------------------------------------------------------------------------------------------------------------------------------|
| <input type="text"/> / <input type="text"/> / <input type="text"/><br><br>Symptoms _____<br>_____ | <input type="text"/> . <input type="text"/><br><input type="text"/> . <input type="text"/><br><input type="text"/> . <input type="text"/><br><input type="radio"/> No symptoms | <input type="radio"/> No<br><input type="radio"/> Yes, Measured<br><input type="radio"/> Yes, Not Measured | ICD-10 Code <input type="text"/> . <input type="text"/><br><input type="radio"/> Diagnosed by parent<br><input type="radio"/> Diagnosed by health care provider<br>_____<br>Diagnosis |
| <input type="text"/> / <input type="text"/> / <input type="text"/><br><br>Symptoms _____<br>_____ | <input type="text"/> . <input type="text"/><br><input type="text"/> . <input type="text"/><br><input type="text"/> . <input type="text"/><br><input type="radio"/> No symptoms | <input type="radio"/> No<br><input type="radio"/> Yes, Measured<br><input type="radio"/> Yes, Not Measured | ICD-10 Code <input type="text"/> . <input type="text"/><br><input type="radio"/> Diagnosed by parent<br><input type="radio"/> Diagnosed by health care provider<br>_____<br>Diagnosis |
| <input type="text"/> / <input type="text"/> / <input type="text"/><br><br>Symptoms _____<br>_____ | <input type="text"/> . <input type="text"/><br><input type="text"/> . <input type="text"/><br><input type="text"/> . <input type="text"/><br><input type="radio"/> No symptoms | <input type="radio"/> No<br><input type="radio"/> Yes, Measured<br><input type="radio"/> Yes, Not Measured | ICD-10 Code <input type="text"/> . <input type="text"/><br><input type="radio"/> Diagnosed by parent<br><input type="radio"/> Diagnosed by health care provider<br>_____<br>Diagnosis |
| <input type="text"/> / <input type="text"/> / <input type="text"/><br><br>Symptoms _____<br>_____ | <input type="text"/> . <input type="text"/><br><input type="text"/> . <input type="text"/><br><input type="text"/> . <input type="text"/><br><input type="radio"/> No symptoms | <input type="radio"/> No<br><input type="radio"/> Yes, Measured<br><input type="radio"/> Yes, Not Measured | ICD-10 Code <input type="text"/> . <input type="text"/><br><input type="radio"/> Diagnosed by parent<br><input type="radio"/> Diagnosed by health care provider<br>_____<br>Diagnosis |
| <input type="text"/> / <input type="text"/> / <input type="text"/><br><br>Symptoms _____<br>_____ | <input type="text"/> . <input type="text"/><br><input type="text"/> . <input type="text"/><br><input type="text"/> . <input type="text"/><br><input type="radio"/> No symptoms | <input type="radio"/> No<br><input type="radio"/> Yes, Measured<br><input type="radio"/> Yes, Not Measured | ICD-10 Code <input type="text"/> . <input type="text"/><br><input type="radio"/> Diagnosed by parent<br><input type="radio"/> Diagnosed by health care provider<br>_____<br>Diagnosis |

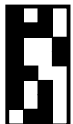

37603
